# Supplementary material
Source: ML conference proceedings conference paper supplement (https://proceedings.neurips.cc/paper_files/paper/2016/hash/678a1491514b7f1006d605e9161946b1-Abstract.html)
Supplement: Supplementary file [file 678a1491514b7f1006d605e9161946b1-Supplemental.zip]

## A Detailed Proof of Theorem 1

*Proof.* For any evaluation set of unobserved entries  $E$ , the expectation of  $\varepsilon$ -risk is

$$\mathbb{E}[\text{Risk}_\varepsilon] = \frac{1}{|E|} \sum_{(u,i) \in E} \mathbb{P}(|f(\mathbf{x}_1(u), \mathbf{x}_2(i)) - \hat{y}(u, i)| > \varepsilon) = \mathbb{P}(|f(\mathbf{x}_1(u), \mathbf{x}_2(i)) - \hat{y}(u, i)| > \varepsilon),$$

because the indexing of the entries are exchangeable and identically distributed. Therefore, in order to bound the expected risk, it is sufficient to provide a tail bound for the probability of the estimation error. For readability, we define the following events: with  $\beta = np^2/2$ ,

- Let  $A$  denote the event that  $|\mathcal{S}_u^\beta(i)| \in [(m-1)p/2, 3(m-1)p/2]$ .
- Let  $B$  denote the event that  $\min_{v \in \mathcal{S}_u^\beta(i)} \sigma_{\mathbf{x}_1(u)\mathbf{x}_1(v)}^2 < \rho$ .
- Let  $C$  denote the event that  $|\mu_{\mathbf{x}_1(u)\mathbf{x}_1(v)} - m_{uv}| < \alpha$  for all  $v \in \mathcal{S}_u^\beta(i)$ .
- Let  $D$  denote the event that  $|s_{uv}^2 - (\sigma_{\mathbf{x}_1(u)\mathbf{x}_1(v)}^2 + 2\gamma^2)| < \rho$  for all  $v \in \mathcal{S}_u^\beta(i)$ .

Consider the following:

$$\begin{aligned} \mathbb{P}(|f(\mathbf{x}_1(u), \mathbf{x}_2(i)) - \hat{y}(u, i)| > \varepsilon) \\ \leq \mathbb{P}(|f(\mathbf{x}_1(u), \mathbf{x}_2(i)) - \hat{y}(u, i)| > \varepsilon | A, B, C, D) + \mathbb{P}(A^c) + \mathbb{P}(B^c|A) + \mathbb{P}(C^c|A, B) + \mathbb{P}(D^c|A, B, C). \end{aligned} \quad (11)$$

Now,

$$\mathbb{P}(A^c) = \mathbb{P}\left(|\mathcal{S}_u^\beta(i)| \notin \left[\frac{(m-1)p}{2}, \frac{3(m-1)p}{2}\right]\right) \leq 2 \exp\left(-\frac{(m-1)p}{12}\right) + (m-1) \exp\left(-\frac{np^2}{8}\right), \quad (12)$$

using Lemma 1. Similarly, using Lemma 2

$$\mathbb{P}(B^c|A) \leq \left(1 - h\left(\sqrt{\frac{\rho}{L^2}}\right)\right)^{\frac{(m-1)p}{2}} \leq \exp\left(-\frac{(m-1)p}{2} h\left(\sqrt{\frac{\rho}{L^2}}\right)\right). \quad (13)$$

Given choice of parameters, i.e. choice of  $m$  and  $p$  large enough for a given  $\rho$ , as we shall argue, the right hand side of (13) will be going to 0, and hence definitely less than 1/2. That is,  $\mathbb{P}(B|A) \geq 1/2$ . Using this fact and Bayes formula, we have

$$\begin{aligned} \mathbb{P}(C^c|A, B) &\leq 2\mathbb{P}(C^c|A) = 2\mathbb{P}\left(\bigcup_{v \in \mathcal{S}_u^\beta(i)} \left\{|\mu_{\mathbf{x}_1(u)\mathbf{x}_1(v)} - m_{uv}| > \alpha\right\} \mid A\right) \\ &\leq 3(m-1)p \exp\left(-\frac{3np^2\alpha^2}{12B^2 + 4B\alpha}\right), \end{aligned} \quad (14)$$

where last inequality follows from union bound, Lemmas 3 and choice of  $\beta = np^2/2$ . Again, choice of parameters, i.e.  $m, n, p$  and  $\alpha$  will be such that we will have the right hand side of (14) going to 0 and definitely less than 1/8. Using this and arguments as used above based on Bayes' formula, we bound

$$\begin{aligned} \mathbb{P}(D^c|A, B, C) &\leq \frac{\mathbb{P}(D^c|A)}{\mathbb{P}(B|A)\mathbb{P}(C|A, B)} \leq 4\mathbb{P}(D^c|A) \\ &= 4\mathbb{P}\left(\bigcup_{v \in \mathcal{S}_u^\beta(i)} \left\{|s_{uv}^2 - (\sigma_{\mathbf{x}_1(u)\mathbf{x}_1(v)}^2 + 2\gamma^2)| > \rho\right\} \mid A\right) \\ &\leq 12(m-1)p \exp\left(-\frac{\beta\rho^2}{4B^2(2LB_{\mathcal{X}}^2 + 4\gamma^2 + \rho)}\right) \end{aligned} \quad (15)$$

where last inequality follows from union bound and Lemma 4.

Finally, with the choice of  $\alpha = \beta^{-1/3}$ , which is  $\left(\frac{np^2}{2}\right)^{-1/3}$  since  $\beta = \frac{np^2}{2}$ , using Lemma 5, we obtain that

$$\begin{aligned} \mathbb{P}(|f(x_1(u), x_2(i)) - \hat{y}(u, i)| > \varepsilon | A, B, C, D) &\leq \frac{3\rho + \gamma^2}{\varepsilon^2} \left(1 - \frac{\alpha}{\varepsilon}\right)^{-2} \\ &\leq \frac{3\rho + \gamma^2}{\varepsilon^2} \left(1 + \frac{3\alpha}{\varepsilon}\right). \end{aligned} \quad (16)$$

where we have used the fact that for given choice of  $\alpha$  (since  $\varepsilon$  is fixed), as  $m$  increases, the term  $\alpha/\varepsilon$  becomes less than  $1/5$ ; for  $x \leq 1/5$ ,  $(1-x)^{-2} \leq (1+3x)$ . If  $p = \omega(m^{-1})$  and  $p = \omega(n^{-1/2})$ , all error terms from (12) to (15) diminish to 0 as  $m, n \rightarrow \infty$ . Specifically, if we choose  $p = \max(m^{-1+\delta}, n^{-1/2+\delta})$ , then putting everything together, we obtain (we assume that  $m/2 \leq m-1 \leq m$ )

$$\begin{aligned} &\mathbb{P}(|f(x_1(u), x_2(i)) - \hat{y}(u, i)| > \varepsilon) \\ &\leq \frac{3\rho + \gamma^2}{\varepsilon^2} \left(1 + \frac{3\sqrt[3]{2}}{\varepsilon} n^{-\frac{2}{3}\delta}\right) + 2 \exp\left(-\frac{1}{24}m^\delta\right) + m \exp\left(-\frac{1}{8}n^{2\delta}\right) \\ &\quad + \exp\left(-\frac{1}{4}h\left(\sqrt{\frac{\rho}{L^2}}\right)m^\delta\right) + 3m^\delta \exp\left(-\frac{1}{5B^2}n^{\frac{2}{3}\delta}\right) \\ &\quad + 12m^\delta \exp\left(-\frac{\rho^2}{8B^2(2LB_\chi^2 + 4\gamma^2 + \rho)}n^{2\delta}\right). \end{aligned}$$

The above bound holds for any  $\rho > 0$ , though as  $\rho \rightarrow 0$ ,  $m, n$  also need to increase accordingly such that  $h\left(\sqrt{\frac{\rho}{L^2}}\right)$  is not too small, and  $\rho$  must be  $\omega(n^{-\delta})$  in order for the last term to vanish. We will impose that  $\rho = \omega(n^{-2\delta/3})$  so that the last term is dominated by the second to last term. When the support of  $P_\chi$  is finite, then

$$h\left(\sqrt{\frac{\rho}{L^2}}\right) \geq \min_{x \in \mathcal{X}} P_\chi(x),$$

such that the above bound holds even when  $\rho = 0$ .  $\square$

## B Useful Lemmas and their Proofs

This section presents key Lemmas that are utilized as part of the proof of Theorem 1. Lemma 1 establishes that as long as  $p$  is large enough, then there are sufficiently large number of rows and columns that have overlap with row and column of a given candidate entry  $(u, i)$ . Lemma 2 establishes that there exists a row  $v$  so that it's variance with respect to row  $u$  is small. Lemmas 3 and 4 prove that the sample mean and sample variance of difference between a pair of rows are good proxy of the actual mean and variances. Collectively, these help establish in Lemma 5 that the true variance between  $u$  and  $u^*$ , the row utilized by nearest neighbor user-user algorithm, is indeed small. These collection of results are established using known inequalities, namely Chernoff, Bernstein and Maurer-Pontil, stated in Section C for completeness.

### B.1 Sufficient overlap

Recall that  $N_1(u)$  represents set of all column indices  $j$  where  $y(u, j)$  is observed. Similarly,  $N_2(i)$  is the set of all row indices  $v$  for which  $y(v, i)$  is observed. For a pair of row indices  $u, v$ ,  $N_1(u, v) = N_1(u) \cap N_1(v)$ . For a given  $\beta \geq 2$ , the set of all rows  $v$  that can lead to a feasible estimation of  $(u, i)$  as per the user-user nearest neighbor algorithm, denoted as  $\mathcal{S}_u^\beta(i)$ , is defined as

$$\mathcal{S}_u^\beta(i) = \{v : v \in N_2(i), |N_1(u, v)| \geq \beta\}.$$

Thus, establishing that  $|\mathcal{S}_u^\beta(i)| \neq 0$  (better yet,  $\gg 0$ ) leads to a guarantee that algorithm will be able to estimate missing entry at index  $(u, i)$ . The next Lemma provides sufficient condition for this event.

**Lemma 1.** *Given  $p > 0$ ,  $2 \leq \beta \leq np^2/2$  and  $\alpha > 0$ , for any  $(u, i) \in [m] \times [n]$ ,*

$$\mathbb{P}(|\mathcal{S}_u^\beta(i)| \notin (1 \pm \alpha)(m-1)p) \leq 2 \exp\left(-\frac{\alpha^2(m-1)p}{3}\right) + (m-1) \exp\left(-\frac{np^2}{8}\right).$$

*Proof.* The set  $\mathcal{S}_u^\beta(i)$  consists of all rows  $v$  such that (a) entry  $(v, i)$  is observed, and (b)  $|N_1(u, v)| \geq \beta$ . For each  $v$ , define binary random variables  $Q_v$  and  $R_v$ , where  $Q_v = 1$  if  $(v, i)$  is observed and 0 otherwise;  $R_v = 1$  if  $|N_1(u, v)| \geq \beta$  and 0 otherwise. Then,  $|\mathcal{S}_u^\beta(i)| = \sum_{v \neq u} Q_v R_v$ . Since  $Q_v, R_v$  are binary variables and number of different  $v \neq u$  are  $m - 1$ , we obtain that for any  $0 \leq a < b \leq m - 1$ ,

$$\mathbb{P}\left(|\mathcal{S}_u^\beta(i)| \notin [a, b]\right) \leq \mathbb{P}\left(\sum_{v \neq u} Q_v \notin [a, b]\right) + \mathbb{P}\left(\sum_{v \neq u} R_v < m - 1\right). \quad (17)$$

Given that entries for each row  $v$  are sampled independently, we have that  $\sum_{v \neq u} Q_v$  is Binomial with parameters  $(m - 1)$  and  $p$ . For choice of  $a = (1 - \alpha)(m - 1)p$  and  $b = (1 + \alpha)(m - 1)p$ , a direct application of Chernoff's bound (see Section C for detail) implies that

$$\mathbb{P}\left(\sum_{v \neq u} Q_v \notin [(1 - \alpha)(m - 1)p, (1 + \alpha)(m - 1)p]\right) \leq 2 \exp\left(-\frac{\alpha^2(m - 1)p}{3}\right). \quad (18)$$

For  $R_v = 1$ , we require that  $|N_1(u, v)| \geq \beta$ . Given the sampling distribution,  $N_1(u, v)$  is Binomial with parameters  $n$  and  $p^2$ . Therefore, for  $\beta \leq np^2/2$ , by another application of Chernoff's bound for lower tail, we obtain

$$\mathbb{P}(R_v = 0) \leq \exp\left(-\frac{np^2}{8}\right). \quad (19)$$

That is,

$$\mathbb{P}\left(\sum_{v \neq u} R_v < m - 1\right) \leq \sum_{v \neq u} \mathbb{P}(R_v = 0) \leq (m - 1) \exp\left(-\frac{np^2}{8}\right). \quad (20)$$

From (17)-(20), we obtain the desired result.  $\square$

## B.2 Existence of a good neighbor

In order to show that a good-quality neighbor can be detected through sample variance, we need to show there exists a neighbor row whose true sample variance is small. Recall that latent space  $\mathcal{X}_1$  is compact and bounded,  $f$  is Lipschitz. We shall assume that the distribution  $P_{\mathcal{X}_1}$  allows every nontrivial ball around any sample point in  $\mathcal{X}_1$  obtained by sampling as per  $P_{\mathcal{X}_1}$  have a positive measure. Under these conditions, next Lemma states that there exists a close neighbor for every point with high probability.

**Lemma 2.** Let  $(\mathcal{X}_1, P_{\mathcal{X}_1})$  admit a nondecreasing function  $h : \mathbb{R}_{++} \rightarrow (0, 1]$  satisfying

$$P_{\mathcal{X}_1}(\mathbf{x} \in B(x_0, r)) \geq h(r), \quad \forall x_0 \in \mathcal{X}_1, r > 0,$$

where  $B(x_0, r) \triangleq \{x \in \mathcal{X}_1 : d_{\mathcal{X}_1}(x, x_0) \leq r\}$ . Consider  $u \in [n]$  and set  $\mathcal{S} \subset [n] \setminus \{u\}$ . Then for any  $\rho > 0$ ,

$$\mathbb{P}\left(\min_{v \in \mathcal{S}} \sigma_{\mathbf{x}_1(u)\mathbf{x}_1(v)}^2 > \rho\right) \leq \left(1 - h\left(\sqrt{\frac{\rho}{L^2}}\right)\right)^{|\mathcal{S}|}.$$

*Proof.* Recall that  $\sigma_{ab}^2 \triangleq \text{Var}_{\mathbf{x} \sim P_{\mathcal{X}_2}}[f(a, \mathbf{x}) - f(b, \mathbf{x})]$ , for any  $a, b \in \mathcal{X}_1$ . By Lipschitz property of  $f$ , we have that for any  $x \in \mathcal{X}_2$ ,

$$|f(a, x) - f(b, x)| \leq L d_{\mathcal{X}_1}(a, b). \quad (21)$$

Therefore, it follows that

$$\begin{aligned} \sigma_{ab}^2 &= \text{Var}[f(a, \mathbf{x}) - f(b, \mathbf{x})] \leq \mathbb{E}[(f(a, \mathbf{x}) - f(b, \mathbf{x}))^2] \\ &\leq L^2 d_{\mathcal{X}_1}(a, b)^2. \end{aligned} \quad (22)$$

Now,

$$\mathbb{P}\left(\min_{v \in \mathcal{S}} \sigma_{\mathbf{x}_1(u)\mathbf{x}_1(v)}^2 > \rho\right) = \mathbb{P}(\cap_{v \in \mathcal{S}} \sigma_{\mathbf{x}_1(u)\mathbf{x}_1(v)}^2 > \rho) = \mathbb{P}\left(\sigma_{\mathbf{x}_1(u)\mathbf{x}_1(v)}^2 > \rho\right)^{|\mathcal{S}|},$$

where the last equality uses independence across sampling of  $\mathbf{x}_1(v)$  for different  $v$  and identical distribution,  $P_{\mathcal{X}_1}$ . From (22), it follows that if  $\sigma_{\mathbf{x}_1(u)\mathbf{x}_1(v)}^2 > \rho$  then  $d_{\mathcal{X}_1}(\mathbf{x}_1(u), \mathbf{x}_1(v)) > \sqrt{\rho/L^2}$ . Therefore, using definition of  $h$ , we obtain that

$$\begin{aligned} \mathbb{P}\left(\sigma_{\mathbf{x}_1(u)\mathbf{x}_1(v)}^2 > \rho\right) &\leq \mathbb{P}\left(d_{\mathcal{X}_1}(\mathbf{x}_1(u), \mathbf{x}_1(v)) > \sqrt{\frac{\rho}{L^2}}\right) \\ &= \left(1 - \mathbb{P}\left(d_{\mathcal{X}_1}(\mathbf{x}_1(u), \mathbf{x}_1(v)) \leq \sqrt{\frac{\rho}{L^2}}\right)\right) \\ &\leq \left(1 - h\left(\sqrt{\frac{\rho}{L^2}}\right)\right). \end{aligned}$$

Putting all of the above together, we obtain the desired result.  $\square$

**How does  $h$  look like?** In order to provide some understanding toward the assumption on distribution  $P_{\mathcal{X}_1}$ , observe that the function  $h(\cdot)$  is a form of the cumulative distribution function (CDF) for  $P_{\mathcal{X}_1}$ . The only distribution which does not satisfy this property is a distribution which has non-atomic isolated points. However, these isolated points have measure zero, such that they will never appear in our datasets with probability 1. We provide a few examples of distributions and their corresponding functions  $h(\cdot)$ .

**Example 1** (extremely uniform). Suppose that  $\mathcal{X} = \times_{k=1}^d [a_i, b_i] \in \mathbb{R}^d$  equipped with  $L_\infty$  norm and  $P_{\mathcal{X}}$  is a uniform distribution over  $\mathcal{X}$ . We can see that the function  $h(r) := \prod_{k=1}^d \min\left\{1, \frac{r}{b_i - a_i}\right\}$  satisfies the condition  $P_{\mathcal{X}}(\mathbf{x} \in B(x_0, r)) \geq h(r)$ ,  $\forall x_0 \in \mathcal{X}, \forall r > 0$ .

**Example 2** (extremely clustered). Suppose that  $\mathcal{X} = \{x_1, \dots, x_d\}$  equipped with the discrete topology and  $P_{\mathcal{X}}$  is expressed in terms of its pmf  $P_{\mathcal{X}}(x_k) = p_k$  with  $\sum_{k=1}^d p_k = 1$ . We can see that the function  $h(r) := \min_k p_k$  works for  $(\mathcal{X}, P_{\mathcal{X}})$ .

### B.3 Concentration of Sample Mean and Sample Variance

**Lemma 3.** Given  $u, v \in [m]$ ,  $i \in [n]$  and  $\beta \geq 2$ , for any  $\alpha > 0$ ,

$$\mathbb{P}\left(|\mu_{\mathbf{x}_1(u)\mathbf{x}_1(v)} - m_{uv}| > \alpha \mid v \in \mathcal{S}_u^\beta(i)\right) \leq \exp\left(-\frac{3\beta\alpha^2}{6B^2 + 2B\alpha}\right),$$

where recall that  $B = 2(LB_{\mathcal{X}} + B_\eta)$ .

*Proof.* Given  $\mathbf{x}_1(u) = x_1(u), \mathbf{x}_1(v) = x_1(v)$ , the mean  $\mu_{x_1(u)x_1(v)}$  is a constant. Recall that empirical mean  $m_{uv}$  is defined as

$$m_{uv} = \frac{1}{|N_1(u, v)|} \left( \sum_{j \in N_1(u, v)} y(u, j) - y(v, j) \right). \quad (23)$$

The variable  $\mathbf{x}_2(j)$  is sampled as per  $P_{\mathcal{X}_2}$ , independently from  $x_1(u), x_1(v)$ . And the noise term in each of the observation is independent zero-mean variable. Therefore, conditioned on  $\mathbf{x}_1(u) = x_1(u), \mathbf{x}_1(v) = x_1(v)$ , we have independent random variable,  $Z(j) = y(u, j) - y(v, j)$  for  $j \in N_1(u, v)$ , that have mean  $\mu_{x_1(u)x_1(v)}$ . That is,  $\tilde{Z}(j) = Z(j) - \mu_{x_1(u)x_1(v)}$ ,  $j \in N_1(u, v)$  are zero-mean independent random variables. And by definition, each of them is bounded as

$$|\tilde{Z}(j)| \leq 2B_\eta + LB_{\mathcal{X}} \leq 2(LB_{\mathcal{X}} + B_\eta) = B. \quad (24)$$

In summary, conditioned on  $\mathbf{x}_1(u) = x_1(u), \mathbf{x}_1(v) = x_1(v)$  and  $N_1(u, v)$ ,  $\mu_{x_1(u)x_1(v)} - m_{uv}$  is the average of  $N_1(u, v)$  independent, zero mean random variables  $\tilde{Z}(j)$ , each of which have absolute value bounded above by  $B$ . Therefore, an application of Bernstein's inequality imply that

$$\mathbb{P}\left(|\mu_{x_1(u)x_1(v)} - m_{uv}| > \alpha \mid \mathbf{x}_1(u) = x_1(u), \mathbf{x}_1(v) = x_1(v), N_1(u, v)\right) \leq \exp\left(-\frac{3|N_1(u, v)|\alpha^2}{6B^2 + 2B\alpha}\right). \quad (25)$$

When  $v \in S_u^\beta(i)$ ,  $|N_1(u, v)| \geq \beta$ . Further, since above holds for all possibilities of  $x_1(u), x_2(v)$ , we conclude that

$$\mathbb{P}(|\mu_{\mathbf{x}_1(u)\mathbf{x}_1(v)} - m_{uv}| > \alpha \mid v \in S_u^\beta(i)) \leq \exp\left(-\frac{3\beta\alpha^2}{6B^2 + 2B\alpha}\right),$$

□

Next we establish the concentration of the sample variance.

**Lemma 4.** *Given  $u \in [m]$ ,  $i \in [n]$ , and  $\beta \geq 2$ , for any  $\rho > 0$ ,*

$$\mathbb{P}\left(\left|s_{uv}^2 - (\sigma_{\mathbf{x}_1(u)\mathbf{x}_1(v)}^2 + 2\gamma^2)\right| > \rho \mid v \in S_u^\beta(i)\right) \leq 2 \exp\left(-\frac{\beta\rho^2}{4B^2(2LB_{\mathcal{X}}^2 + 4\gamma^2 + \rho)}\right),$$

where recall that  $B = 2(LB_{\mathcal{X}} + B_\eta)$ .

*Proof.* Recall  $\sigma_{ab}^2 \triangleq \text{Var}[f(a, \mathbf{x}) - f(b, \mathbf{x})]$  for  $a, b \in \mathcal{X}_1$ ,  $\mathbf{x} \sim P_{\mathcal{X}_2}$ , and sample variance between rows  $u, v$  is defined as

$$\begin{aligned} s_{uv}^2 &= \frac{1}{2|N_1(u, v)|(|N_1(u, v)| - 1)} \sum_{j, j' \in N_1(u, v)} ((y(u, j) - y(v, j)) - (y(u, j') - y(v, j')))^2 \\ &= \frac{1}{|N_1(u, v)| - 1} \sum_{j \in N_1(u, v)} (y(u, j) - y(v, j) - m_{uv})^2. \end{aligned}$$

Conditioned on  $\mathbf{x}_1(u) = x_1(u)$ ,  $\mathbf{x}_1(v) = x_1(v)$ , we obtain that  $\mathbb{E}[s_{uv}^2] = \sigma_{x_1(u)x_1(v)}^2 + 2\gamma^2$ , with respect to randomness induced by  $P_{\mathcal{X}_2}$  for sampling latent parameters for columns. Further,  $X(j) = y(u, j) - y(v, j)$  are independent random variables conditioned on  $\mathbf{x}_1(u) = x_1(u)$ ,  $\mathbf{x}_1(v) = x_1(v)$ . Using the fact that  $f$  is Lipschitz, space is bounded and noise is bounded, as before, we obtain that

$$|X(j)| = |y(u, j) - y(v, j)| \leq 2(LB_{\mathcal{X}} + B_\eta) = B.$$

Given this, by an application of Maurer-Pontil inequality (see Section C), we obtain that

$$\begin{aligned} \mathbb{P}\left(\left|s_{uv}^2 - (\sigma_{x_1(u)x_1(v)}^2 + 2\gamma^2)\right| > \rho \mid v \in S_u^\beta(i), \mathbf{x}_1(u) = x_1(u), \mathbf{x}_1(v) = x_1(v)\right) \\ \leq 2 \exp\left(-\frac{\beta\rho^2}{4B^2(2(\sigma_{x_1(u)x_1(v)}^2 + 2\gamma^2) + \rho)}\right), \end{aligned} \quad (26)$$

where we used the property that  $v \in S_u^\beta(i)$  implies  $|N_1(u, v)| \geq \beta$ . Using the Lipschitz property of  $f$  and boundedness of  $\mathcal{X}_1$ , we can bound  $\sigma_{x_1(u)x_1(v)}^2 \leq L^2 B_{\mathcal{X}}^2$  as before. Therefore, the right hand side of (26) can be bounded as

$$\leq 2 \exp\left(-\frac{\beta\rho^2}{4B^2(2L^2 B_{\mathcal{X}}^2 + 4\gamma^2 + \rho)}\right). \quad (27)$$

Given that this bound is independent of  $x_1(u), x_1(v)$ , we can conclude the desired result. □

#### B.4 Concentration of Estimate

Now we establish the final step in the proof of Theorem 1. As in the proof of Theorem 1, for a given  $(u, i)$  with  $u \in [m]$ ,  $i \in [n]$  and  $\beta \geq 2$ , define events

- Let  $A$  denote the event that  $|S_u^\beta(i)| \in [(m-1)p/2, 3(m-1)p/2]$ ,
- Let  $B$  denote the event that  $\min_{v \in S_u^\beta(i)} \sigma_{\mathbf{x}_1(u)\mathbf{x}_1(v)}^2 < \rho$ ,
- Let  $C$  denote the event that  $|\mu_{\mathbf{x}_1(u)\mathbf{x}_1(v)} - m_{uv}| < \alpha$  for all  $v \in S_u^\beta(i)$ ,
- Let  $D$  denote the event that  $\left|s_{uv}^2 - (\sigma_{\mathbf{x}_1(u)\mathbf{x}_1(v)}^2 + 2\gamma^2)\right| < \rho$  for all  $v \in S_u^\beta(i)$ .

**Lemma 5.** *Under the setting described above and given  $\alpha > 0$ ,  $\rho > 0$  and  $\varepsilon > \alpha$ , under the algorithm user-user nearest neighbor, we have*

$$\mathbb{P}(|f(\mathbf{x}_1(u), \mathbf{x}_2(i)) - \hat{y}(u, i)| > \varepsilon \mid A, B, C, D) \leq \frac{3\rho + \gamma^2}{(\varepsilon - \alpha)^2}.$$

*Proof.* Under the algorithm user-user nearest neighbor, the error of the estimate is given by

$$\begin{aligned} f(\mathbf{x}_1(u), \mathbf{x}_2(i)) - \hat{y}(u, i) &= f(\mathbf{x}_1(u), \mathbf{x}_2(i)) - y(u^*, i) - m_{uu^*} \\ &= f(\mathbf{x}_1(u), \mathbf{x}_2(i)) - f(\mathbf{x}_1(u^*), \mathbf{x}_2(i)) - \eta_{u^*, i} - m_{uu^*}. \end{aligned}$$

Given  $\mathbf{x}_1(u) = x_1(u)$ ,  $\mathbf{x}_1(u^*) = x_1(u^*)$  such that events  $A, B, C$  and  $D$  are satisfied, we have that

$$\mathbb{E}[f(x_1(u), \mathbf{x}_2(i)) - f(x_1(u^*), \mathbf{x}_2(i)) - \eta_{u^*, i}] = \mu_{x_1(u)x_1(u^*)}, \quad (28)$$

with respect to  $\mathbf{x}_2(i) \sim P_{\mathcal{X}_2}$ .

Conditioned on event  $C$ , that is,  $|\mu_{x_1(u)x_1(v)} - m_{uv}| < \alpha$  for all  $v \in \mathcal{S}_u^\beta(i)$ , included  $u^*$ , it is sufficient to bound the probability of event

$$E = \left\{ |f(x_1(u), \mathbf{x}_2(i)) - f(x_1(u^*), \mathbf{x}_2(i)) - \eta_{u^*, i} - \mu_{uu^*}| > \varepsilon - \alpha \right\}. \quad (29)$$

Conditioned on  $\mathbf{x}_1(u) = x_1(u)$ ,  $\mathbf{x}_1(u^*) = x_1(u^*)$ ,

$$\text{Var}[f(x_1(u), \mathbf{x}_2(i)) - f(x_1(u^*), \mathbf{x}_2(i)) - \eta_{u^*, i}] = \sigma_{x_1(u)x_1(u^*)}^2 + \gamma^2, \quad (30)$$

Therefore, by standard Chebychev's inequality, we obtain

$$\mathbb{P}(|f(x_1(u), \mathbf{x}_2(i)) - f(x_1(u^*), \mathbf{x}_2(i)) - \eta_{u^*, i} - \mu_{x_1(u)x_1(u^*)}| > \varepsilon - \alpha) \leq \frac{\sigma_{x_1(u)x_1(u^*)}^2 + \gamma^2}{(\varepsilon - \alpha)^2}. \quad (31)$$

The selection of  $u^*$  was done using empirical estimates  $s_{uv}^2$  across  $v \in \mathcal{S}_u^\beta(i)$ . By condition on event  $D$  happening, we have that for any  $v \in \mathcal{S}_u^\beta(i)$ ,  $s_{uv}^2$  is within  $\rho$  of  $(\sigma_{x_1(u)x_1(v)}^2 + 2\gamma^2)$ . And condition on event  $B$ , we have that there is at least one  $v \in \mathcal{S}_u^\beta(i)$  so that  $\sigma_{x_1(u)x_1(v)}^2 < \rho$ ; let one such  $v$  be denoted as  $v^*$ . Therefore, we obtain that

$$\begin{aligned} \sigma_{x_1(u)x_1(u^*)}^2 + 2\gamma^2 - \rho &\leq s_{uu^*}^2 \\ &\leq s_{uv}^2 \\ &\leq \sigma_{x_1(u)x_1(v)}^2 + 2\gamma^2 + \rho \\ &\leq 2\gamma^2 + 2\rho. \end{aligned} \quad (32)$$

From above, we can conclude that  $\sigma_{x_1(u)x_1(u^*)}^2 \leq 3\rho$ . Replacing this in (31), we obtain the bound on right hand side as

$$\leq \frac{3\rho + \gamma^2}{(\varepsilon - \alpha)^2}. \quad (33)$$

Since this bound holds for all choices of  $\mathbf{x}_1(u), \mathbf{x}_1(u^*)$  conditioned on events  $A, B, C$  and  $D$ , we conclude the desired result.  $\square$

## C Useful Inequalities

**Lemma 6** (Bernstein's Inequality). *If  $X_1, \dots, X_n$  are independent zero-mean r.v. such that  $|X_i| \leq M$  almost surely, then for all  $t$ ,*

$$\begin{aligned} \mathbb{P}\left(\frac{1}{n} \sum_{i=1}^n X_i > t\right) &\leq \exp\left(-\frac{3n^2 t^2}{2(3 \sum_j \mathbb{E}[X_j^2] + Mnt)}\right) \\ &\leq \exp\left(-\frac{3nt^2}{6M^2 + 2Mt}\right). \end{aligned}$$

**Lemma 7** (Chernoff's Inequality). *If  $X_1, \dots, X_n$  are independent r.v. such that  $X_i \in (0, 1)$ , and let  $X$  denote their sum. Then for any  $\delta \in (0, 1)$ ,*

$$\mathbb{P}(X \leq (1 - \delta)\mathbb{E}[X]) \leq \exp(-\delta^2\mu/2),$$

and for any  $\delta > 0$ ,

$$\mathbb{P}(X \geq (1 + \delta)\mathbb{E}[X]) \leq \exp(-\delta^2\mu/3)$$

**Lemma 8** (Maurer-Pontil Inequality [19]). *For  $n \geq 2$ , let  $X_1, \dots, X_n$  be independent random variables such that  $X_i \in (0, 1)$ . Let  $V(X)$  denote their sample variance, i.e.,  $V(X) = \frac{1}{2n(n-1)} \sum_{i,j} (X_i - X_j)^2$ . Let  $\sigma^2 = \mathbb{E}[V(X)]$  denote the true variance. For any  $\delta \in (0, 1)$ ,*

$$\mathbb{P}(V(X) - \sigma^2 < -s) \leq \exp\left(-\frac{(n-1)s^2}{2\sigma^2}\right),$$

and

$$\mathbb{P}(V(X) - \sigma^2 > s) \leq \exp\left(-\frac{(n-1)s^2}{2\sigma^2 + s}\right).$$

The Maurer-Pontil Inequality implies the following corollary for all bounded random variables.

**Corollary 1.** *For  $n \geq 2$ , let  $X_1, \dots, X_n$  be independent random variables such that  $X_i \in (a, b)$ . Let  $V(X)$  denote their sample variance, i.e.,  $V(X) = \frac{1}{2n(n-1)} \sum_{i,j} (X_i - X_j)^2$ . Let  $\sigma^2 = \mathbb{E}[V(X)]$  denote the true variance. For any  $\delta \in (0, 1)$ ,*

$$\mathbb{P}(|V(X) - \sigma^2| < s) \leq 2 \exp\left(-\frac{(n-1)s^2}{(b-a)^2(2\sigma^2 + s)}\right).$$
